# Supplementary material for: Fetal growth trajectories in pregnancies of European and South Asian mothers with and without gestational diabetes, a population-based cohort study
Source: PubMed Central journal article supplement (PMC5333847; doi:10.1371/journal.pone.0172946), 2017-03-02

**S1 Fig.** Flow chart showing maternal-fetal-pairs selected for analysis.

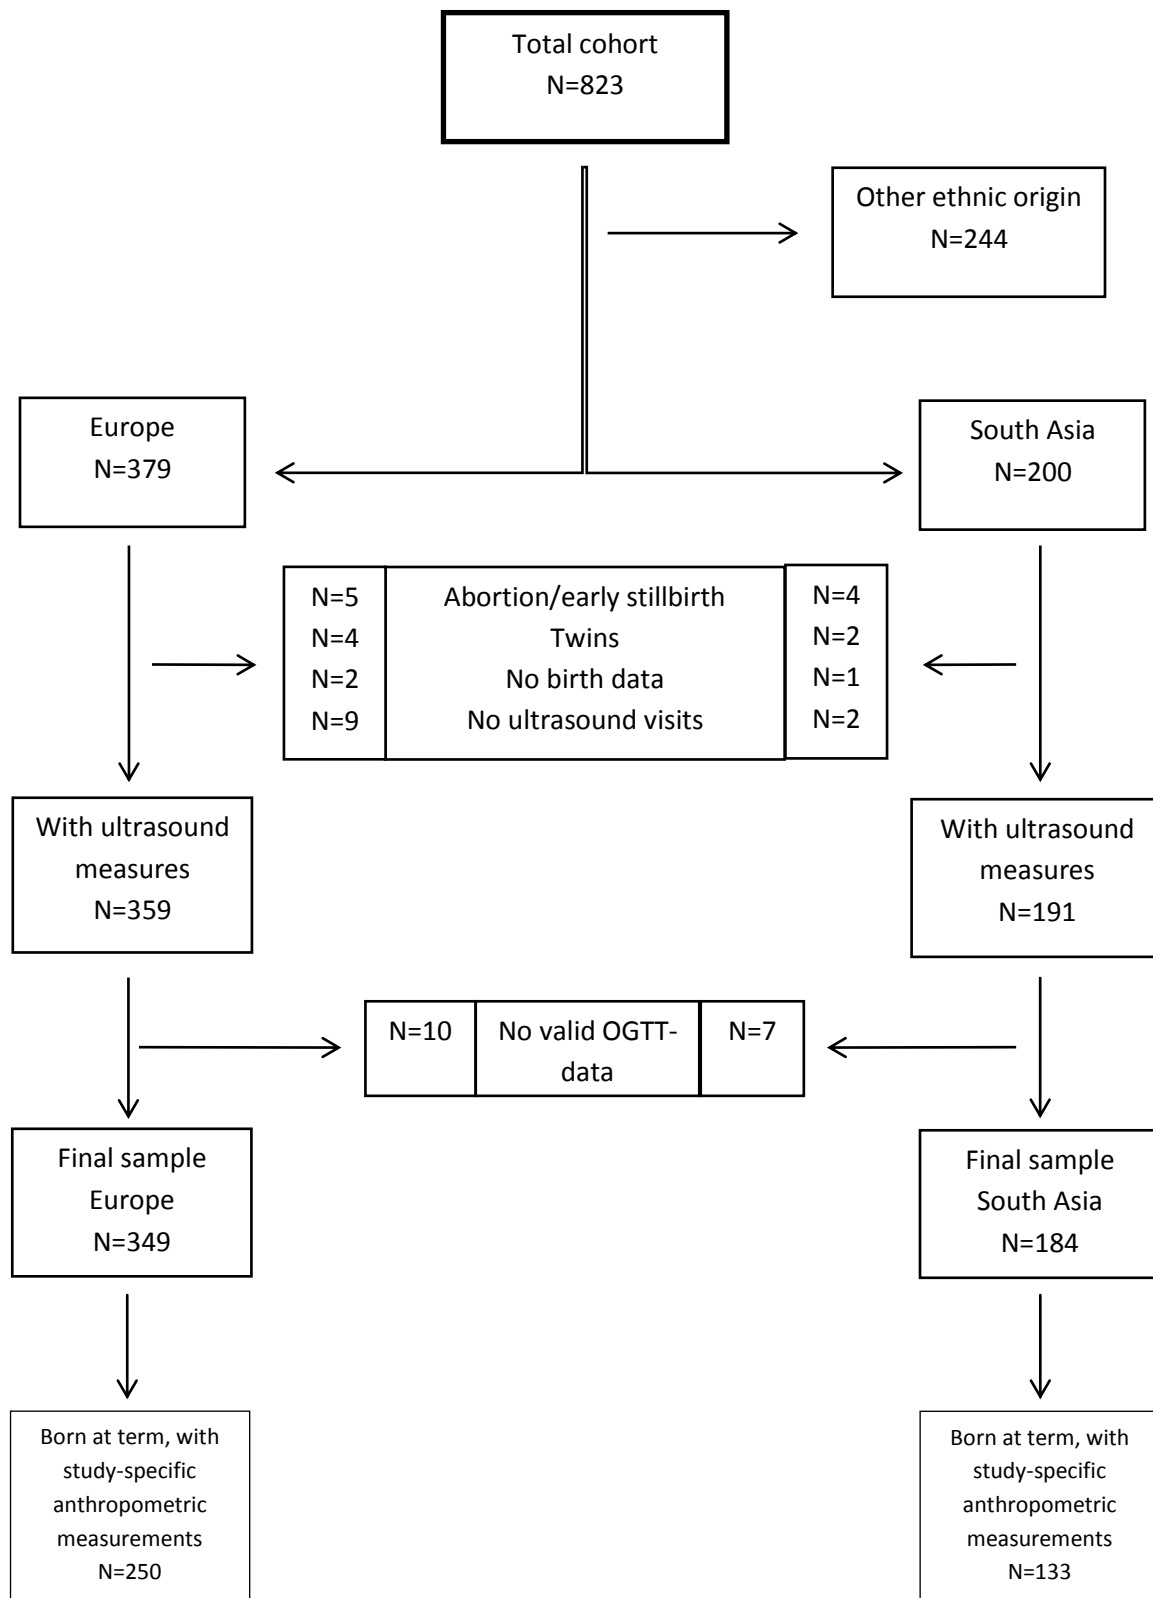

Supplement: pone.0172946.s001.pdf [file pone.0172946.s001.pdf]
