# Supplementary material for: Fetal growth trajectories in pregnancies of European and South Asian mothers with and without gestational diabetes, a population-based cohort study
Source: PubMed Central journal article supplement (PMC5333847; doi:10.1371/journal.pone.0172946), 2017-03-02

**S2 Fig.** Distribution of pre-pregnant BMI and HbA1c level in European (black bars, solid line) and South Asians (white bars, dotted line), with non-linear robust fitted Gaussian curves.

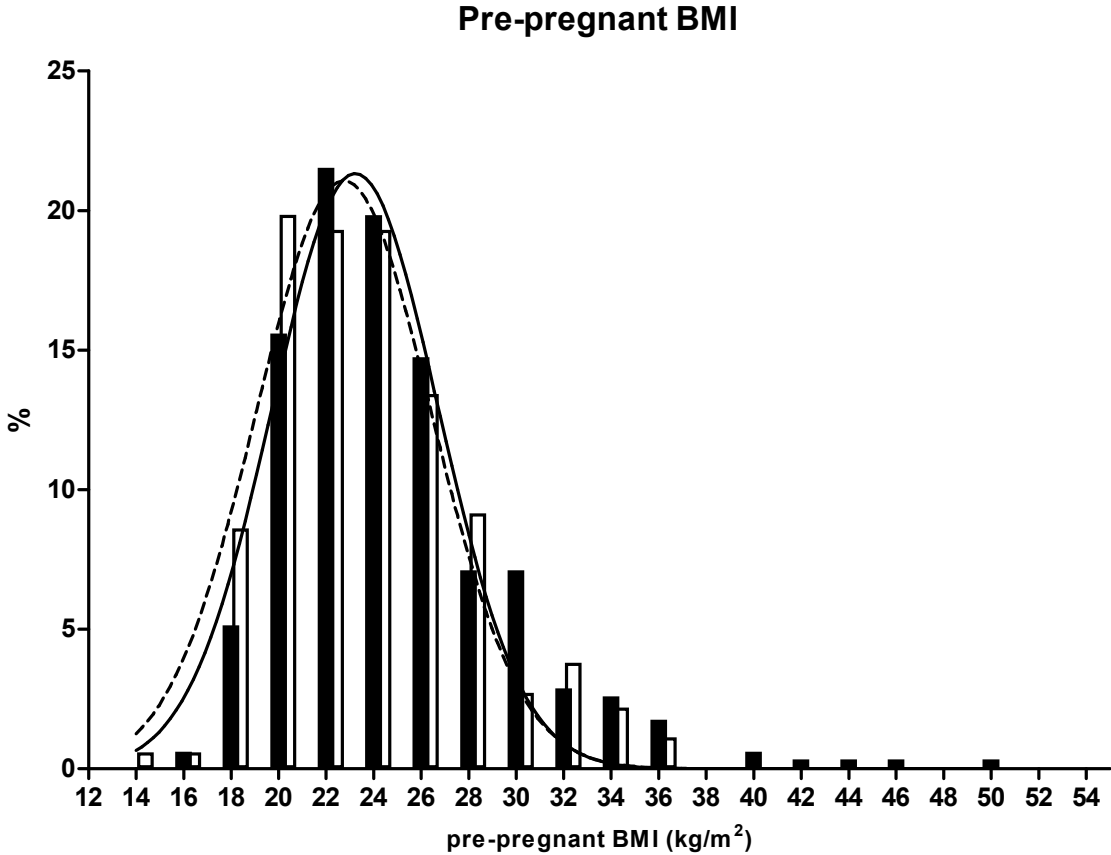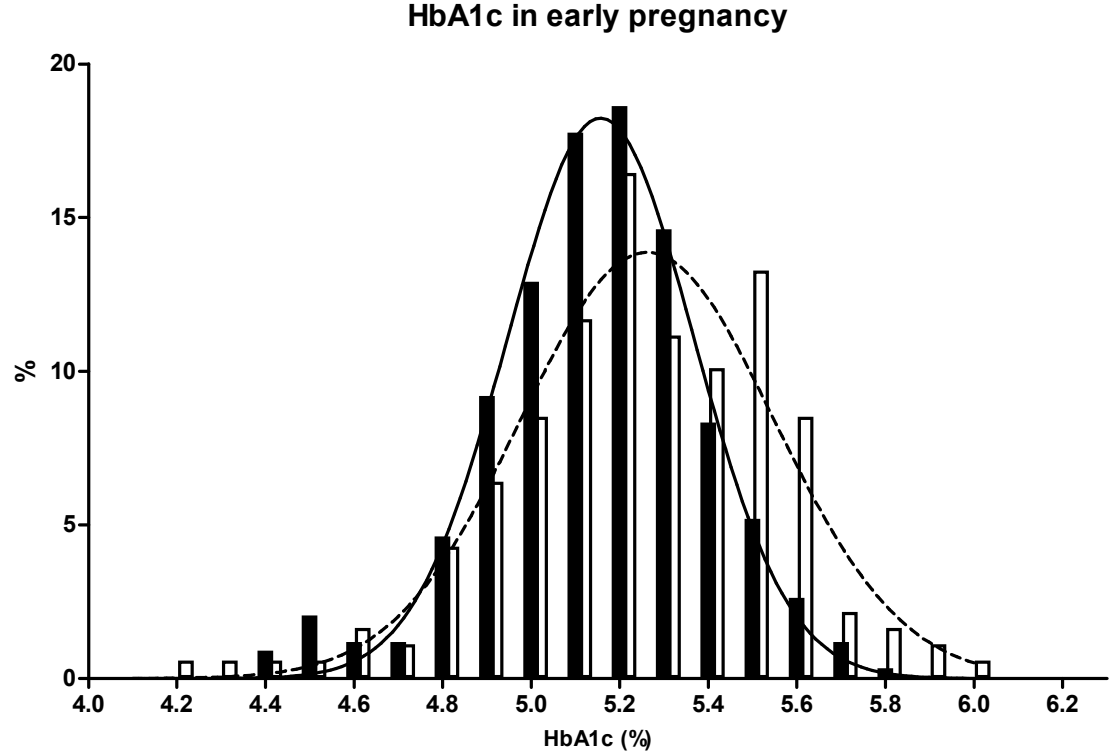

Supplement: pone.0172946.s002.pdf [file pone.0172946.s002.pdf]
